# Supplementary material
Source: PubMed Central journal article supplement (PMC1885609)

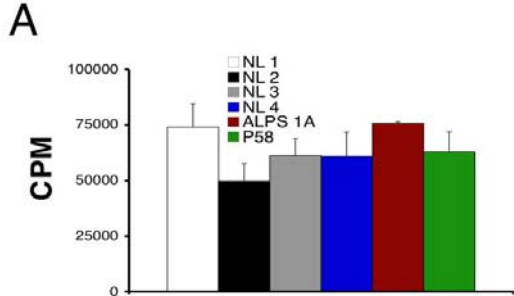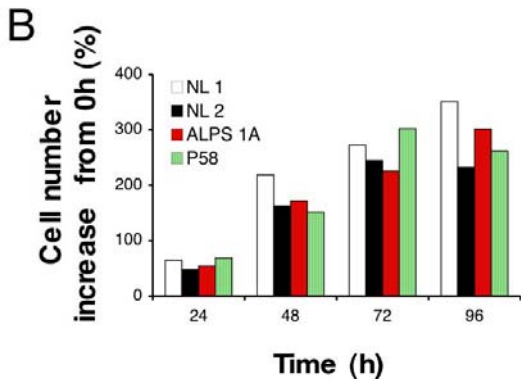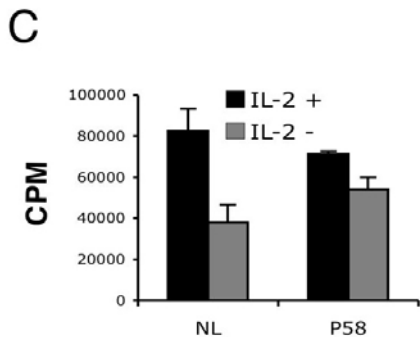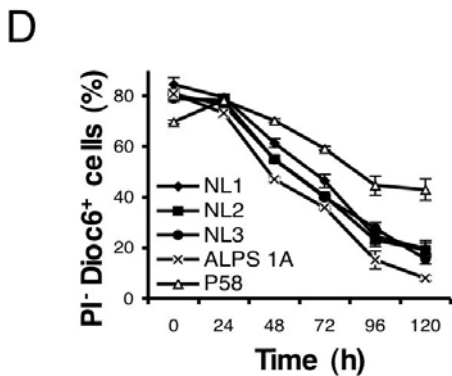

Supplement: pnas_0702975104_1.pdf [file pnas_0702975104_1.pdf]

**A**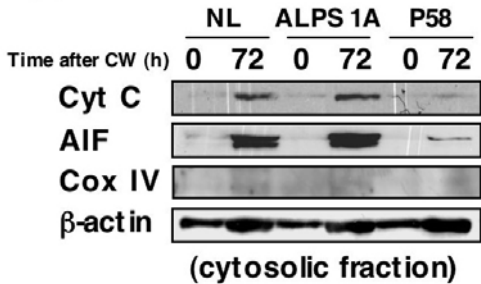**B**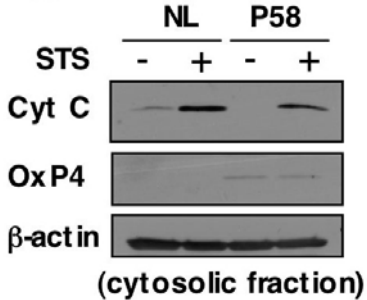

Supplement: pnas_0702975104_2.pdf [file pnas_0702975104_2.pdf]

**A**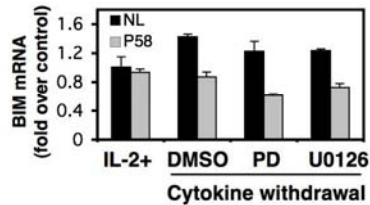**B**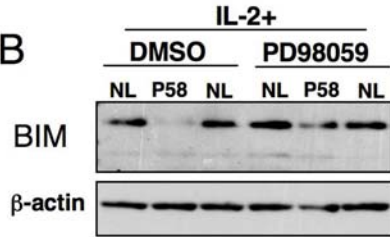**C**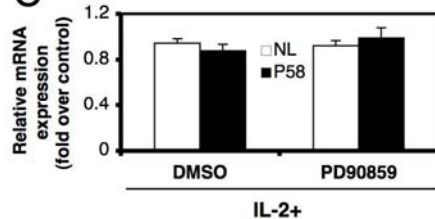

Supplement: pnas_0702975104_3.pdf [file pnas_0702975104_3.pdf]

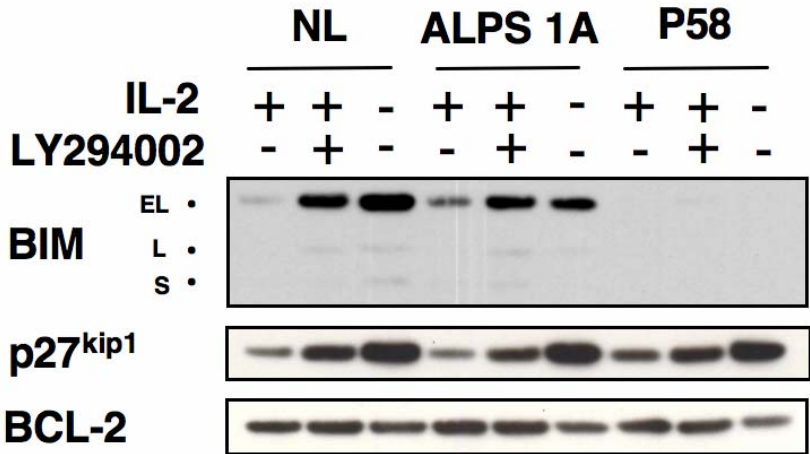

Supplement: pnas_0702975104_4.pdf [file pnas_0702975104_4.pdf]

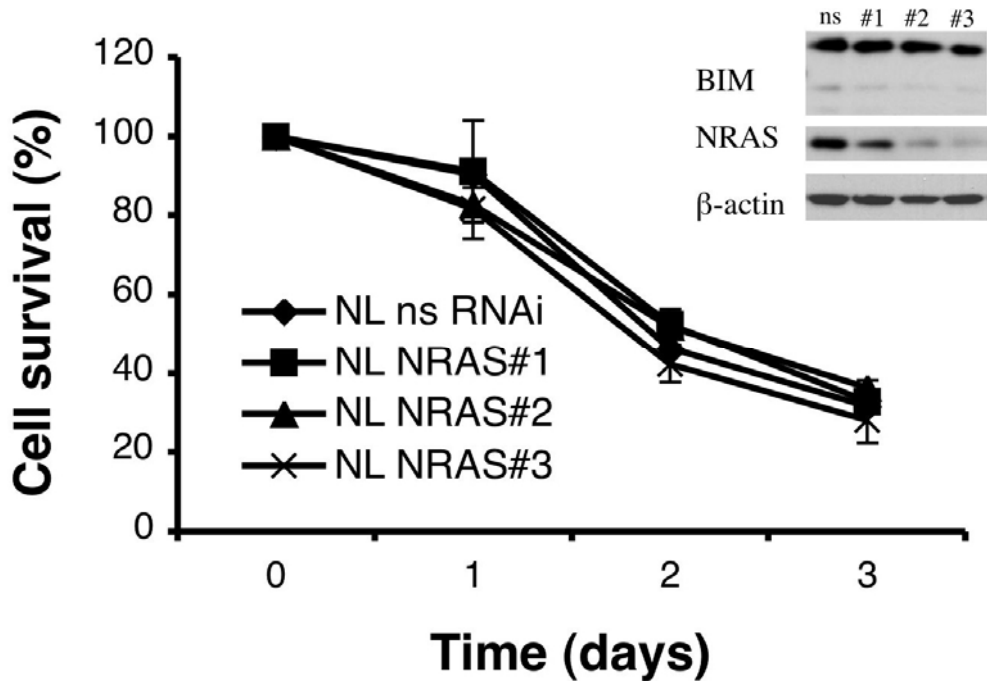

Supplement: pnas_0702975104_5.pdf [file pnas_0702975104_5.pdf]
